# Supplementary material for: Immunogenicity of a New Recombinant Vaccine against Enterotoxemia and Infectious Necrotic Hepatitis in Ruminants
Source: Research Square preprint supplement (doi:10.21203/rs.3.rs-6020304/v1), 2025-04-02

Additional file 1 of **(a)** recombinant epsilon toxin protein from *Clostridium perfringens* (*CpDetx*), **(b)** recombinant beta toxin protein from *Clostridium perfringens (CpCcbp),* **(c)** recombinant alpha toxin protein from *Clostridium novyi* (*CnBtcn-alpha*)


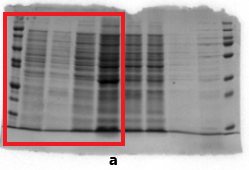

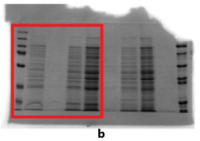

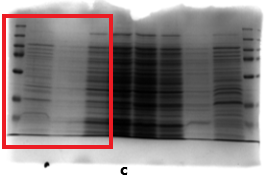

Supplement: Supplementary file 1 [file dd27d9ac6d407251a02399d5.docx]
